# Supplementary material
Source: publisher figshare collection journal article supplement (https://frontiersin.figshare.com/ndownloader/files/31588364)
Supplement: Supplementary file [file 31588364]

Supplement 3 The AUC of serum TNC and critical illness scores for all-cause 28-day mortality

|           | Emergency (Derivation) Cohort |         | Inpatient (Validation) Cohort |         |
|-----------|-------------------------------|---------|-------------------------------|---------|
|           | AUC (95%CI)                   | P       | AUC (95%CI)                   | P       |
| TNC       | 0.803 (0.717, 0.888)          | < 0.001 | 0.745 (0.624, 0.865)          | < 0.001 |
| SOFA      | 0.808 (0.725, 0.891)          | < 0.001 | 0.844 (0.776, 0.912)          | < 0.001 |
| APACHE II | 0.762 (0.667, 0.857)          | < 0.001 | 0.846 (0.780, 0.912)          | < 0.001 |
| SAPS II   | 0.779 (0.685, 0.872)          | < 0.001 | 0.872 (0.808, 0.936)          | < 0.001 |

AUC, area under receiver operating curve; CI, confidence index; TNC, tenascin-C; SOFA, Sequential Organ Failure Assessment; APACHE II, Acute Physiology and Chronic Health Evaluation II; SAPS II, Simplified Acute Physiology Score II.
